# Supplementary material
Source: Springer Nature journal article supplement (https://www.springermedizin.de/resource/supplementary/13012_2012_606_MOESM3_ESM.pdf/9630378)
Supplement: MOESM3 [file 9630378]

**Additional File 3:** Proportion of behavioural support sessions each manual-specified BCT was delivered in according to session type (pre-quit, quit-day, post-quit), presented combined for both services.

| <b>BCT Label</b>                                                     | <b>No. pre-quit sessions delivered in according to pre-quit manual specification</b> | <b>No. quit-day sessions delivered in according to quit-day manual specification</b> | <b>No. post-quit sessions delivered in according to post-quit manual specification</b> | <b>Total No. sessions BCT delivered in according to manual specification (max n=34)</b> |
|----------------------------------------------------------------------|--------------------------------------------------------------------------------------|--------------------------------------------------------------------------------------|----------------------------------------------------------------------------------------|-----------------------------------------------------------------------------------------|
| Provide rewards contingent on successfully stopping smoking          | -*                                                                                   | -                                                                                    | 13/22                                                                                  | 13/22 (59%)                                                                             |
| Provide rewards contingent on effort or progress                     | -                                                                                    | -                                                                                    | 18/22                                                                                  | 18/22 (82%)                                                                             |
| Identify reasons for wanting/not wanting to stop smoking             | 4/4 (100%)                                                                           | 1/2 (50%)                                                                            | 4/7                                                                                    | 9/13 (69%)                                                                              |
| Measure CO and explain purpose of CO monitoring                      | 8/8 (100%)                                                                           | 4/4 (100%)                                                                           | 18/22 (82%)                                                                            | 30/34 (88%)                                                                             |
| Facilitate relapse prevention and coping                             | 0/4 (0%)                                                                             | 1/4 (25%)                                                                            | 9/22 (41%)                                                                             | 10/30 (33%)                                                                             |
| Facilitate action planning/ develop treatment plan                   | 6/8 (75%)                                                                            | 2/2 (100%)                                                                           | -                                                                                      | 8/10 (80%)                                                                              |
| Facilitate goal setting                                              | -                                                                                    | 2/2 (100%)                                                                           | 1/7 (14%)                                                                              | 3/9 (33%)                                                                               |
| Prompt review of set goals                                           | 0/4 (0%)                                                                             | 0/2 (0%)                                                                             | 15/22 (68%)                                                                            | 15/28 (53%)                                                                             |
| Prompt self-recording                                                | 3/4 (75%)                                                                            | 1/2 (50%)                                                                            | -                                                                                      | 4/6 (67%)                                                                               |
| Advise on changing routine                                           | 2/4 (50%)                                                                            | -                                                                                    | -                                                                                      | 2/4 (50%)                                                                               |
| Advise on environmental restructuring                                | 2/4 (50%)                                                                            | 2/2 (100%)                                                                           | -                                                                                      | 4/6 (67%)                                                                               |
| Set graded tasks                                                     | 0/4 (0%)                                                                             | -                                                                                    | -                                                                                      | 0/4 (0%)                                                                                |
| Advise on stop smoking medication                                    | 8/8 (100%)                                                                           | 4/4 (100%)                                                                           | 20/22 (91%)                                                                            | 32/34 (94%)                                                                             |
| Ask about experience of stop smoking medications the smoker is using | 0/4 (0%)                                                                             | 4/4 (100%)                                                                           | 18/22 (82%)                                                                            | 22/30 (73%)                                                                             |
| Build rapport                                                        | 4/4 (100%)                                                                           | 2/2 (100%)                                                                           | 14/15 (93%)                                                                            | 20/21 (95%)                                                                             |
| Explain expectations regarding the treatment programme               | 8/8 (100%)                                                                           | 1/2 (50%)                                                                            | -                                                                                      | 9/10 (90%)                                                                              |
| Offer/direct towards appropriate written materials                   | 5/8 (63%)                                                                            | 2/2 (100%)                                                                           | 0/15 (0%)                                                                              | 7/25 (28%)                                                                              |
